# Supplementary material for: Grazing on Upland Pastures Part-Time Instead of Full-Time Affects the Feeding Behavior of Dairy Cows and Has Consequences on Milk Fatty Acid Profiles
Source: PubMed Central journal article supplement (PMC6912772; doi:10.3390/ani9110908), 2019-11-01
Supplement: animals-09-00908-s001.pdf [file animals-09-00908-s001.pdf]

**Table S1.** Least square means of the proportions of the FA in milk fat not listed in Table 5 in the two pasture management systems and the three GEs.

| Fatty Acids<br>g/100 g FA         | System (S) |       | Full-Time Grazing (FT) |                     |                     | Part-Time Grazing (PT) |                     |                      | SEM   | <i>p</i> -Values |        |        |
|-----------------------------------|------------|-------|------------------------|---------------------|---------------------|------------------------|---------------------|----------------------|-------|------------------|--------|--------|
|                                   | FT         | PT    | GE1                    | GE2                 | GE3                 | GE1                    | GE2                 | GE3                  |       | S                | GE     | S × GE |
| C13:0                             | 0.114      | 0.092 | 0.134 <sup>a</sup>     | 0.104 <sup>b</sup>  | 0.104 <sup>b</sup>  | 0.077 <sup>c</sup>     | 0.097 <sup>b</sup>  | 0.101 <sup>b</sup>   | 0.002 | <0.001           | 0.108  | <0.001 |
| <i>iso</i> -C13:0                 | 0.196      | 0.183 | 0.181 <sup>b</sup>     | 0.190 <sup>b</sup>  | 0.217 <sup>a</sup>  | 0.135 <sup>c</sup>     | 0.198 <sup>ab</sup> | 0.216 <sup>ab</sup>  | 0.008 | 0.178            | <0.001 | 0.001  |
| <i>anteiso</i> -C14:0             | 0.766      | 0.645 | 0.752 <sup>ab</sup>    | 0.739 <sup>ab</sup> | 0.806 <sup>a</sup>  | 0.510 <sup>c</sup>     | 0.678 <sup>b</sup>  | 0.746 <sup>a</sup>   | 0.024 | <0.001           | <0.001 | <0.001 |
| <i>iso</i> -C15:0                 | 0.087      | 0.068 | 0.075 <sup>bc</sup>    | 0.103 <sup>a</sup>  | 0.082 <sup>bc</sup> | 0.055 <sup>d</sup>     | 0.068 <sup>c</sup>  | 0.082 <sup>b</sup>   | 0.004 | 0.004            | <0.001 | <0.001 |
| <i>iso</i> -C16:0                 | 0.255      | 0.255 | 0.238 <sup>ab</sup>    | 0.278 <sup>ab</sup> | 0.248 <sup>ab</sup> | 0.267 <sup>b</sup>     | 0.251 <sup>a</sup>  | 0.247 <sup>b</sup>   | 0.008 | 0.986            | 0.043  | 0.001  |
| C18:1 <i>t</i> 6/7/8 <sup>1</sup> | 0.293      | 0.335 | 0.233 <sup>c</sup>     | 0.270 <sup>bc</sup> | 0.375 <sup>a</sup>  | 0.317 <sup>ab</sup>    | 0.350 <sup>ab</sup> | 0.340 <sup>ab</sup>  | 0.018 | 0.100            | <0.001 | <0.001 |
| C18:1 <i>t</i> 10                 | 0.359      | 0.359 | 0.315 <sup>d</sup>     | 0.361 <sup>c</sup>  | 0.401 <sup>ab</sup> | 0.394 <sup>abc</sup>   | 0.428 <sup>a</sup>  | 0.359 <sup>bcd</sup> | 0.014 | 0.070            | <0.001 | <0.001 |
| C18:1 <i>t</i> 12                 | 0.347      | 0.329 | 0.325 <sup>a</sup>     | 0.360 <sup>a</sup>  | 0.354 <sup>a</sup>  | 0.349 <sup>a</sup>     | 0.355 <sup>a</sup>  | 0.284 <sup>b</sup>   | 0.019 | 0.497            | 0.002  | <0.001 |
| C18:1 <i>c</i> 11                 | 0.759      | 0.830 | 0.691 <sup>c</sup>     | 0.732 <sup>bc</sup> | 0.854 <sup>a</sup>  | 0.847 <sup>a</sup>     | 0.802 <sup>ab</sup> | 0.841 <sup>a</sup>   | 0.024 | 0.003            | <0.001 | <0.001 |
| C18:1 <i>c</i> 12                 | 0.130      | 0.150 | 0.105 <sup>b</sup>     | 0.116 <sup>b</sup>  | 0.167 <sup>a</sup>  | 0.129 <sup>b</sup>     | 0.162 <sup>a</sup>  | 0.160 <sup>a</sup>   | 0.006 | 0.023            | <0.001 | <0.001 |
| C18:1 <i>c</i> 13                 | 0.129      | 0.107 | 0.127                  | 0.127               | 0.129               | 0.109                  | 0.106               | 0.105                | 0.008 | 0.068            | 0.924  | 0.829  |
| C18:1 <i>c</i> 14 + <i>t</i> 16   | 0.316      | 0.260 | 0.270 <sup>c</sup>     | 0.324 <sup>ab</sup> | 0.355 <sup>a</sup>  | 0.251 <sup>c</sup>     | 0.253 <sup>c</sup>  | 0.276 <sup>bc</sup>  | 0.011 | 0.001            | <0.001 | 0.004  |
| C18:2 <i>t</i> 9, <i>t</i> 12     | 0.480      | 0.442 | 0.433 <sup>b</sup>     | 0.452 <sup>ab</sup> | 0.555 <sup>a</sup>  | 0.453 <sup>ab</sup>    | 0.443 <sup>ab</sup> | 0.432 <sup>b</sup>   | 0.028 | 0.278            | 0.063  | 0.009  |
| C18:2 <i>c</i> 9, <i>c</i> 11     | 0.064      | 0.039 | 0.052 <sup>bc</sup>    | 0.078 <sup>a</sup>  | 0.062 <sup>b</sup>  | 0.034 <sup>c</sup>     | 0.043 <sup>bc</sup> | 0.041 <sup>bc</sup>  | 0.006 | 0.006            | <0.001 | 0.023  |
| C18:2 <i>t</i> 9, <i>t</i> 11     | 0.033      | 0.033 | 0.031                  | 0.033               | 0.037               | 0.029                  | 0.033               | 0.037                | 0.003 | 0.928            | 0.015  | 0.365  |
| C18:2 <i>c</i> 9, <i>t</i> 12     | 0.054      | 0.045 | 0.024 <sup>b</sup>     | 0.057 <sup>a</sup>  | 0.079 <sup>a</sup>  | 0.051 <sup>ab</sup>    | 0.041 <sup>ab</sup> | 0.043 <sup>ab</sup>  | 0.009 | 0.460            | 0.010  | <0.001 |
| C18:2 <i>t</i> 9, <i>c</i> 12     | 0.597      | 0.494 | 0.491 <sup>cd</sup>    | 0.615 <sup>ab</sup> | 0.684 <sup>a</sup>  | 0.428 <sup>d</sup>     | 0.451 <sup>bd</sup> | 0.603 <sup>ac</sup>  | 0.035 | 0.040            | <0.001 | 0.042  |
| C18:2 <i>c</i> 9, <i>c</i> 15     | 0.169      | 0.153 | 0.155                  | 0.165               | 0.186               | 0.144                  | 0.154               | 0.161                | 0.008 | 0.175            | <0.001 | 0.116  |
| C18:3n-6                          | 0.057      | 0.049 | 0.053                  | 0.057               | 0.062               | 0.048                  | 0.045               | 0.053                | 0.004 | 0.032            | 0.058  | 0.509  |
| C19:0                             | 0.099      | 0.097 | 0.101 <sup>ab</sup>    | 0.082 <sup>b</sup>  | 0.113 <sup>a</sup>  | 0.087 <sup>ab</sup>    | 0.096 <sup>ab</sup> | 0.108 <sup>ab</sup>  | 0.006 | 0.800            | <0.001 | 0.034  |
| C20:1 <i>t</i>                    | 0.056      | 0.034 | 0.067 <sup>a</sup>     | 0.077 <sup>a</sup>  | 0.023 <sup>b</sup>  | 0.025 <sup>b</sup>     | 0.051 <sup>a</sup>  | 0.027 <sup>b</sup>   | 0.006 | 0.003            | <0.001 | <0.001 |
| C20:1 <i>c</i> 5                  | 0.128      | 0.101 | 0.110                  | 0.146               | 0.127               | 0.080                  | 0.129               | 0.094                | 0.010 | 0.040            | <0.001 | 0.582  |
| C20:1 <i>c</i> 9                  | 0.156      | 0.164 | 0.110 <sup>c</sup>     | 0.135 <sup>b</sup>  | 0.221 <sup>a</sup>  | 0.119 <sup>bc</sup>    | 0.129 <sup>bc</sup> | 0.244 <sup>a</sup>   | 0.008 | 0.422            | <0.001 | 0.011  |
| C20:1 <i>c</i> 11                 | 0.080      | 0.070 | 0.055 <sup>d</sup>     | 0.078 <sup>bc</sup> | 0.108 <sup>a</sup>  | 0.068 <sup>cd</sup>    | 0.054 <sup>d</sup>  | 0.093 <sup>ab</sup>  | 0.005 | 0.085            | <0.001 | <0.001 |
| C20:2n-6                          | 0.075      | 0.068 | 0.065                  | 0.077               | 0.083               | 0.055                  | 0.072               | 0.078                | 0.004 | 0.093            | <0.001 | 0.531  |
| C20:3n-3                          | 0.079      | 0.079 | 0.068                  | 0.083               | 0.085               | 0.066                  | 0.082               | 0.088                | 0.004 | 0.971            | <0.001 | 0.471  |
| C20:3n-6                          | 0.048      | 0.040 | 0.046                  | 0.049               | 0.048               | 0.031                  | 0.045               | 0.042                | 0.004 | 0.070            | 0.062  | 0.267  |
| C20:4n-3                          | 0.064      | 0.054 | 0.065                  | 0.067               | 0.060               | 0.052                  | 0.054               | 0.056                | 0.003 | 0.016            | 0.707  | 0.237  |
| C20:4n-6                          | 0.071      | 0.072 | 0.059                  | 0.083               | 0.071               | 0.065                  | 0.073               | 0.077                | 0.005 | 0.867            | 0.006  | 0.165  |
| C20:5n-3                          | 0.099      | 0.085 | 0.089 <sup>c</sup>     | 0.109 <sup>a</sup>  | 0.099 <sup>b</sup>  | 0.070 <sup>d</sup>     | 0.091 <sup>bc</sup> | 0.094 <sup>bc</sup>  | 0.003 | <0.001           | <0.001 | 0.003  |
| C22:0                             | 0.102      | 0.108 | 0.078 <sup>d</sup>     | 0.103 <sup>c</sup>  | 0.124 <sup>b</sup>  | 0.070 <sup>d</sup>     | 0.106 <sup>bc</sup> | 0.144 <sup>a</sup>   | 0.004 | 0.323            | <0.001 | 0.001  |

|          |       |       |                    |                    |                    |                     |                     |                    |       |        |        |        |
|----------|-------|-------|--------------------|--------------------|--------------------|---------------------|---------------------|--------------------|-------|--------|--------|--------|
| C22:1 c9 | 0.162 | 0.169 | 0.179              | 0.166              | 0.141              | 0.155               | 0.171               | 0.180              | 0.012 | 0.596  | 0.705  | 0.018  |
| C22:4n-6 | 0.039 | 0.035 | 0.036              | 0.037              | 0.044              | 0.024               | 0.038               | 0.044              | 0.003 | 0.360  | <0.001 | 0.028  |
| C22:5n-3 | 0.009 | 0.008 | 0.010              | 0.009              | 0.009              | 0.007               | 0.008               | 0.008              | 0.002 | 0.464  | 0.973  | 0.603  |
| C22:5n-6 | 0.041 | 0.028 | 0.049 <sup>a</sup> | 0.033 <sup>c</sup> | 0.036 <sup>b</sup> | 0.030 <sup>cd</sup> | 0.030 <sup>cd</sup> | 0.024 <sup>d</sup> | 0.002 | <0.001 | <0.001 | <0.001 |
| C22:6n-3 | 0.030 | 0.023 | 0.038              | 0.018              | 0.036              | 0.021               | 0.020               | 0.028              | 0.008 | 0.451  | 0.048  | 0.246  |

SEM: Standard error of the mean. <sup>a-d</sup> Within the same variable, means without a common superscript letter are significantly different according to Tukey's test ( $p < 0.05$ ).

<sup>1</sup> C18:1 *t*6, C18:1 *t*7, and C18:1 *t*8 could not be differentiated with the chromatographic procedure applied.
